# Supplementary figures and images for: Endogenous GDNF Is Unable to Halt Dopaminergic Injury Triggered by Microglial Activation
Source: MDPI journal article supplement (doi:10.3390/cells13010074), 2023-12-29

Supplementary Figure S3

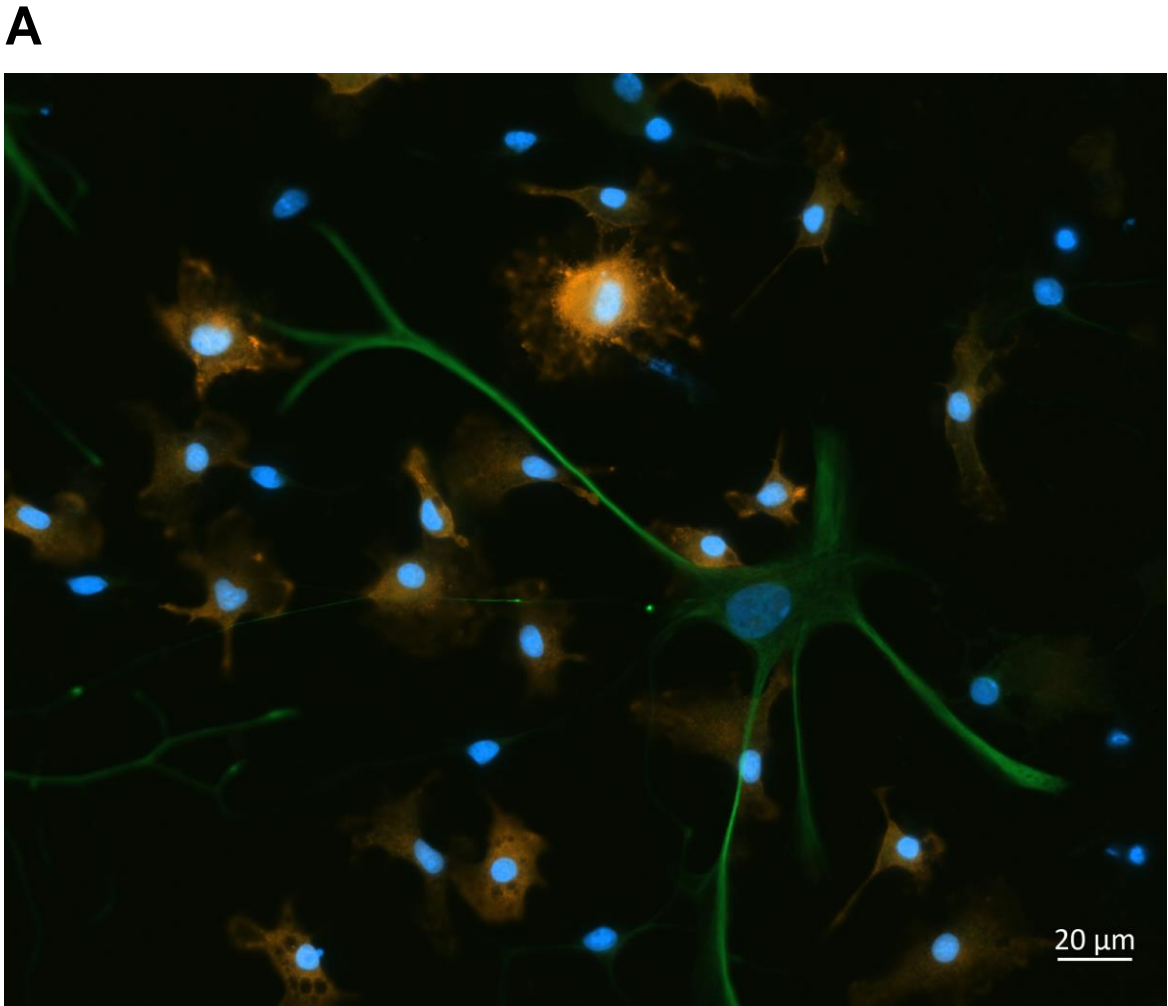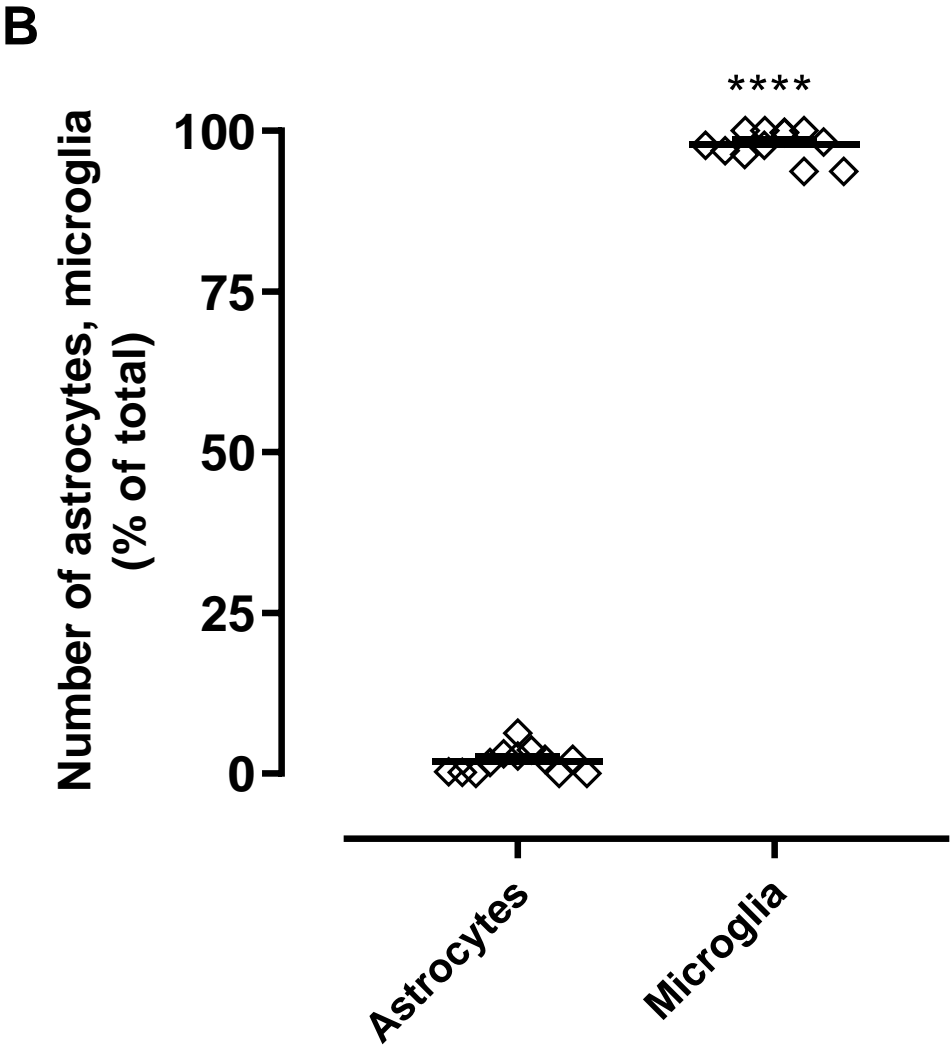

Supplement: s1 [file s1]

## Supplementary Figure S1

**A**

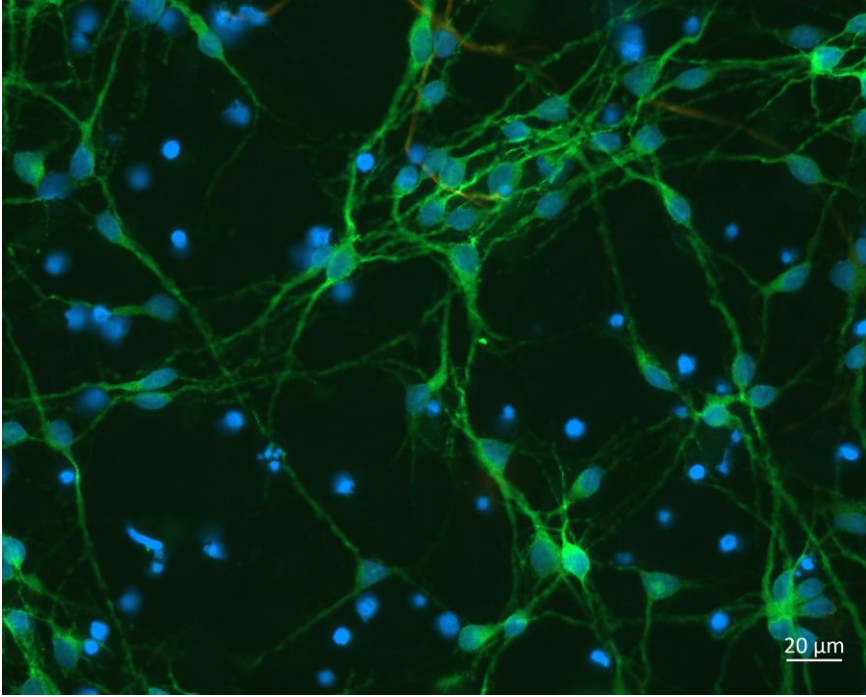

# B

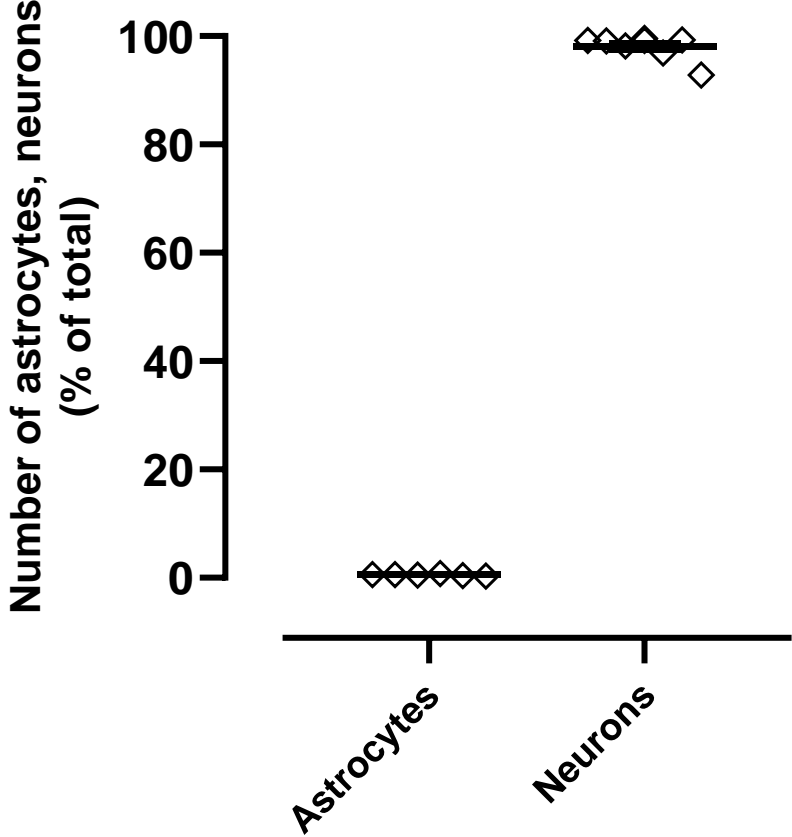

Supplement: s1 [file s1]

Supplementary Figure S2

A

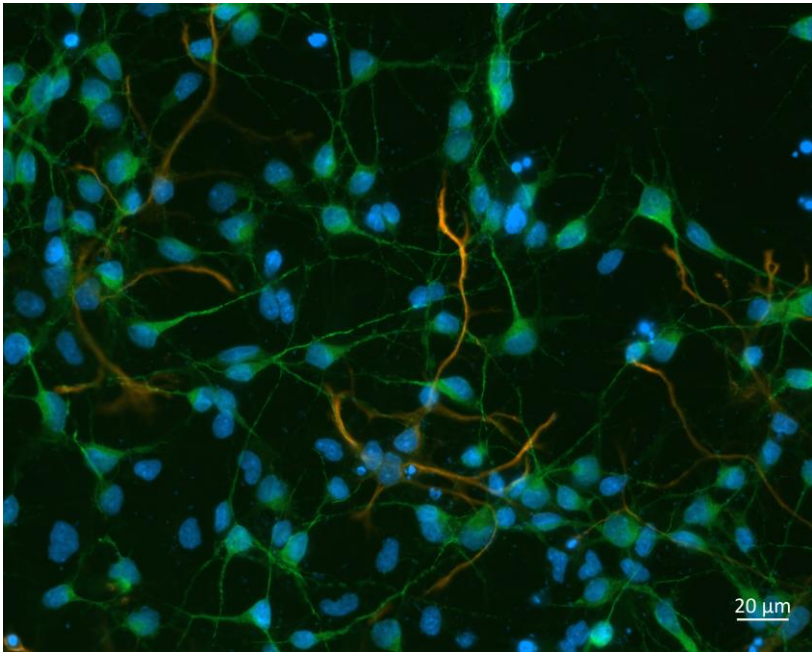

B

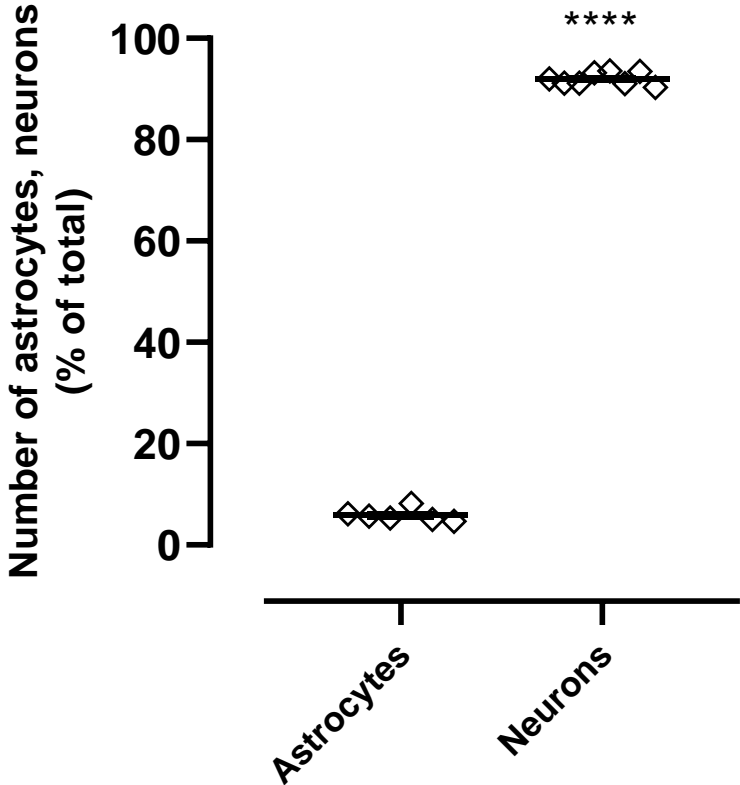

Supplement: s1 [file s1]

Supplementary Figure S4

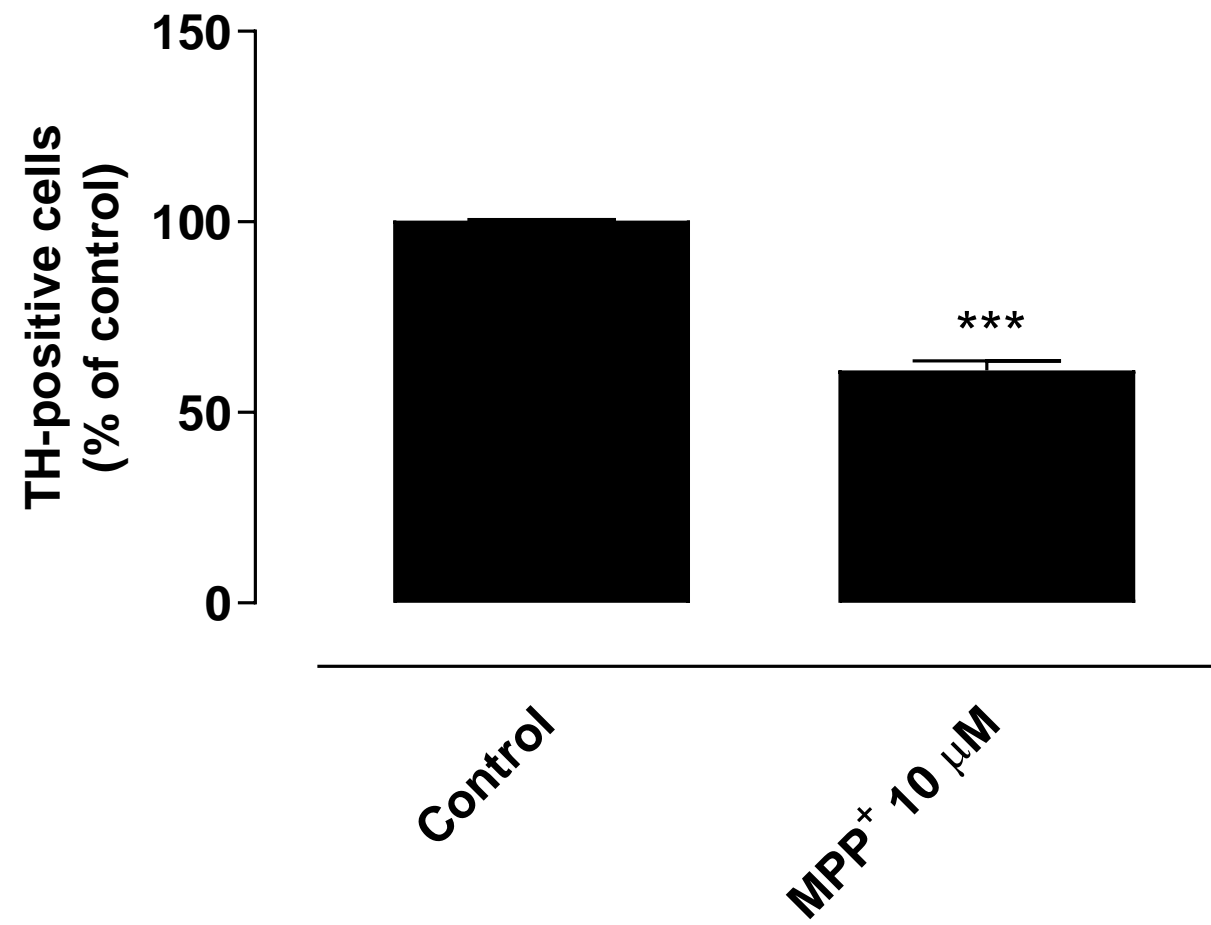

Supplement: s1 [file s1]
